# Supplementary material
Source: PubMed Central journal article supplement (PMC3817915)
Supplement: CJN.11321112_CJN11321112SupplementaryData.pdf [file CJN.11321112_CJN11321112SupplementaryData.pdf]

## Author Affiliations

Joshua I. Barzilay,<sup>1</sup> James F. Lovato,<sup>2</sup> Anne M. Murray,<sup>3</sup> Jeff Williamson,<sup>4</sup> Faramaz Ismail-Beigi,<sup>5</sup> Diane Karl,<sup>6</sup> Vasilios Papademetriou,<sup>7</sup> Lenore J. Launer<sup>8</sup>

1. Division of Endocrinology, Kaiser Permanente of Georgia, and Division of Endocrinology, Emory University School of Medicine, Atlanta, GA.

2. Department of Biostatistical Sciences, Wake Forest University, Winston Salem, NC.

3. Department of Medicine, Division of Geriatrics, Hennepin County Medical Center, Minneapolis, MN, and Department of Medicine, University of Minnesota, Minneapolis, MN.

4. Sticht Center on Aging, Wake Forest University, Winston Salem, NC.

5. Department of Medicine, University Hospitals and Cleveland VA Medical Center, Case Western Reserve University, Cleveland, OH.

6. The Endocrine Clinic and Oregon Health & Science University, Portland, OR.

7. Department of Medicine, Division of Cardiology, Veterans Affairs and Georgetown University Medical Centers, Washington, DC.

8. Laboratory of Epidemiology and Population Sciences, Intramural Research Program, National Institute on Aging, Bethesda, MD.
